# Supplementary material
Source: PubMed Central journal article supplement (PMC7309808)
Supplement: mmc1.pdf [file mmc1.pdf]

**Immunity, Volume 53**

**Supplemental Information**

**The COVID-19 Serology Studies Workshop:**

**Recommendations and Challenges**

**Andrea M. Lerner, Robert W. Eisinger, Douglas R. Lowy, Lyle R. Petersen, Rosemary Humes, Matthew Hepburn, and M. Cristina Cassetti**

**Supplemental Table 1: COVID-19 Serology Studies Workshop List of Participants (May 7, 2020)**

|                                           |                                               |
|-------------------------------------------|-----------------------------------------------|
| Alberto Abate, bioMerieux                 | Jean Chen, inBios                             |
| Sophie Ablott, bioMerieux                 | Wilbur Chen, University of Maryland           |
| Yomi Adekeye, FDA                         | Joseph Chiapperi, Ortho Clinical Diagnostics  |
| Ali Alhassani, BCG                        | Frances Chu, inBios                           |
| Mary Allen, NIH                           | Helen Chun, CDC                               |
| Sara Asad, BCG                            | Liz Church, NIH                               |
| Hugh Auchincloss, NIH                     | Gavin Cloherty, Abbott                        |
| Alison Augustine, NIH                     | Myron Cohen, UNC School of Medicine           |
| Francisco Averhoff, CDC                   | J. Coloma, UC Berkeley                        |
| Jonathan Baghdadi, University of Maryland | Paul Contestable, Ortho Clinical Diagnostics  |
| Todd Bailey, Premier Biotech              | Michael Cooper, NIH                           |
| Allison Bardagjy, InBios                  | Margaret Cortese, CDC                         |
| Sridhar Basavaraju, CDC                   | Shannon Crane, Orasure                        |
| Travis Battiest, FEMA                     | Chase Crawford, NIH                           |
| Jane Battles, VA                          | Derek Cummings, University of Florida         |
| Sara Bazaco, DoD                          | Patricia D'Souza, NIH                         |
| Maureen Beanan, NIH                       | Charles Daitch, HHS                           |
| Brooke Beaulieu, CSTE                     | Marilyn Daly, NIH                             |
| Patrice Becker, NIH                       | Que Dang, NIH                                 |
| Tammy Beckham, HHS                        | soizic Daniel, bioMerieux                     |
| Hamilton Bennett, Moderna                 | Abhijit Datta, Diazyme                        |
| Caryn Bern, UCSF                          | Matthew Davenport, HHS                        |
| Franck Berthier, bioMerieux               | Victoria Davey, VA                            |
| Matthew Biggerstaff, CDC                  | Manli Davis, Orasure                          |
| Julia Biggins, DoD                        | Randall Davis, Univ. of Alabama at Birmingham |
| Holly Biggs, CDC                          | Fatimah Dawood, CDC                           |
| Cesar Boggiano, NIH                       | Marciela DeGrace, NIH                         |
| Karin Bok, NIH                            | Augustina Delaney, CDC                        |
| Mason Booth, NIH                          | Mark DelVecchio, HHS                          |
| Lisa Borek, AdvaMed                       | Erica DeMarco, DoD                            |
| Jeffrey Borgia, Rush University           | Josh Denny, NIH                               |
| Muriel Bouchard, bioMerieux               | Dipali Desai, Ortho Clinical Diagnostics      |
| Brooke Bozick, NIH                        | Shannon Dillmore, Becton Dickinson            |
| Lucy Breakwell, CDC                       | Heather Dougherty, DoD                        |
| Margaret Brewinski Isaacs, NIH            | William Dowling, CEPI                         |
| Christopher Broder, USUHS                 | Gina Dunsmuir, Ortho Clinical Diagnostics     |
| Trevor Brown, DoD                         | Paul Eder, HHS                                |
| Liliana Brown, NIH                        | Darin Edwards, Moderna                        |
| Timothy Burgess, USUHS                    | Robert Eisinger, NIH                          |
| Michael Busch, Vitalant                   | Nina El-Badry, HHS                            |
| Alfredo Camacho, Anser                    | Alan Embry, NIH                               |
| James Campbell, University of Maryland    | Jeffrey Engel, CSTE                           |
| Cristina Cardemil, CDC                    | Emily Erbeling, NIH                           |
| Hillary Carter, NSC                       | Javan Esfandiari, ChemBio                     |

|                                               |                                             |
|-----------------------------------------------|---------------------------------------------|
| Cristina Cassetti, NIH                        | Tremel Faison, HHS                          |
| Priya Chandran, BCG                           | Stacy Ferguson, NIH                         |
| Joshua Fine, Tunnell Government Services      | John Hural, Fred Hutch                      |
| Diana Finzi, NIH                              | Julia Hutter, NIH                           |
| Joe Fitzgibbon, NIH                           | Tom Ippolito, ChemBio                       |
| Britta Flach, NIH                             | Renee Ireton, University of Washington      |
| Brendan Flannery, CDC                         | Mia Israel, CSTE                            |
| Brett Forshey, DoD                            | Smita Iyer, UC Davis                        |
| Kate Fowlie, CDC                              | Dan Jernigan, CDC                           |
| Alicia Fry, CDC                               | Keith Jerome, Fred Hutch                    |
| Kelly Gebo, NIH                               | Reigna Jones, NIH                           |
| Sharon Gilles, NIH                            | Douglas Jordan, CDC                         |
| Todd Gleeson, DoD                             | Saleem Kamili, CDC                          |
| Simone Glynn, NIH                             | Sangeeta Kaushik, DHS                       |
| Paul Goepfert, Univ. of Alabama at Birmingham | Diane Kawa, Becton Dickinson                |
| David Goldman, FDA                            | Peter Kim, NIH                              |
| Marlene Goldman, NIH                          | Scott Kim, NIH                              |
| Marga Gomez, NIH                              | Sonnie Kim, NIH                             |
| Paul Goodacre, Ortho Clinical Diagnostics     | Jennifer Kishimori, DoD                     |
| Randy Grimes, Luminex Corp                    | Juli Klemm, NIH                             |
| Lisa Grohskopf, CDC                           | Karl Klontz, FDA                            |
| Jennifer Grossman, NIH                        | James Kobie, Univ. of Alabama at Birmingham |
| Jeet Guram, FDA                               | Salma Kodsi, Becton Dickinson               |
| Sacha Gutierrez, FDA                          | Aparna Kolhekar, NIH                        |
| Aron Hall, CDC                                | Jonathan Kording, DoD                       |
| Janet Hamilton, CSTE                          | Gerald Kovacs, HHS                          |
| Marlene Hanna, Ortho Clinical Diagnostics     | Florian Krammer, Icahn SOM, Mount Sinai     |
| Anthony Harris, University of Maryland        | William Kramp, HHS                          |
| Eva Harris, UC Berkeley                       | Nina Kunwar, Mount Sinai                    |
| Dennis Hartigan-O'Connor, UC Davis            | Preeta Kutty, CDC                           |
| Fiona Havers, CDC                             | Eric Laing, USUHS                           |
| Tonya Hayden, CDC                             | Jim Lane, NIH                               |
| Steve Henn, Abbott                            | Mary Lane, NIH                              |
| Carole Henry, Moderna                         | Gayle Langley, CDC                          |
| Lisa Hensley, NIH                             | Janet Lathey, NIH                           |
| Matthew Hepburn, DoD                          | Judith Lavelle, NIH                         |
| Joe Hiatt, UCSF                               | Jasmine Lawson, CDC                         |
| Josh Hilton, BCG                              | Eun Mi Lee, NIH                             |
| Dr. Dan Hoey, DoD                             | John Lee, HHS                               |
| Linda Holifield-Kennedy, DHS                  | Andrea Lerner, NIH                          |
| Mary Homer, HHS                               | Matthew Lesho, Luminex Corp                 |
| Chris Houchens, HHS                           | Myron Levine, University of Maryland        |
| Dale Hu, NIH                                  | Samantha Lewis, Promega                     |
| Jinjie Hu, Cellex Inc.                        | Lily Li, Ortho Clinical Diagnostics         |
| Tom Hu, HHS                                   | X. James Li, Cellex Inc.                    |
| David Huang, CDC                              | Scott Lindquist, Dept of Health             |

|                                        |                                                |
|----------------------------------------|------------------------------------------------|
| Kyle Hueth, bioMerieux                 | Daniella Livnat, NIH                           |
| Rosemary Humes, HHS                    | Doug Lowy, NIH                                 |
| William Mac Kenzie, CDC                | Sara Palkon, Promega Corporation               |
| Adam MacNeil, CDC                      | S. Sathesh Panayampalli, CDC                   |
| Jessica Maia, Becton Dickinson         | Eunchung Park, NIH                             |
| Angela Malaspina, NIH                  | Andrew Parker, bioMerieux                      |
| Yuka Manabe, Johns Hopkins             | Marcela Pasetti, University of Maryland        |
| Sachin Mani, Moderna                   | Aditi Patel, HHS                               |
| Sara Mann, Promega                     | Sai Patibandla, Siemens                        |
| Mary Marovich, NIH                     | Jean Patterson, NIH                            |
| Hilary Marston, NIH                    | Monica Patton, CDC                             |
| Punam Mathur, NIH                      | Jordan Peart, CSTE                             |
| Susan Mayne, FDA                       | Michael Pensiero, NIH                          |
| Hayleigh McCall, CSTE                  | Lyle Petersen, CDC                             |
| Erin McCombs, Luminex Corp             | Shaun Peterson, Promega                        |
| Michelle McConnell, CDC                | Ligia Pinto, NIH                               |
| Christina McCormick, NIH               | Louise Pitt, DoD                               |
| Adrian McDermott, NIH                  | Laura Polakowski, NIH                          |
| Cliff McDonald, CDC                    | Christine Posavad, Fred Hutch                  |
| Edward McGurrin, HHS                   | Diane Post, NIH                                |
| Vijay Mehra, NIH                       | Lisa Postow, NIH                               |
| Michelle Meigs, APHL                   | Syamal Raychaudhuri, inbios                    |
| Poncho Meisenheimer, Promega           | Sarah Read, NIH                                |
| Claire Midgley, CDC                    | Carrie Reed, CDC                               |
| Christopher Miller, UC Davis           | Nathalie Renard, bioMerieux                    |
| Mark Miller, bioMerieux                | Philip Renzullo, NIH                           |
| Nancy Miller, NIH                      | Dindo Reyes, inbios                            |
| Arnold S Monto, University of Michigan | Mardi Reymann, University of Maryland          |
| Richard Moore, Becton Dickinson        | Catherine Rivera, BCG                          |
| Daniel Morgan, University of Maryland  | Chris Roberts, NIH                             |
| Oliver Morgan, WHO                     | Jennifer Routh, NIH                            |
| Mark Mulligan, NYU Langone             | Marie-Claire Rowlinson, Florida Dept of Health |
| Nutan Mytle, HHS                       | Kevin Ryan, NIH                                |
| James Needham, inbios                  | Jilian Sacks, FIND                             |
| Kathy Neuzil, University of Maryland   | Ben Saida, Diazyme                             |
| Carl Newman, DoD                       | Ren Salerno, CDC                               |
| Mary Nguyen, NIH                       | Samira Sami, CDC                               |
| Lisa Nichols, OSTP                     | Mathew Sapiano, CDC                            |
| Vladimir Nozinic, Abbott               | Jeremy Schubert, Abbott                        |
| Lyndsay O'Hara, University of Maryland | Seila Selimovic, HHS                           |
| Brendan O'Leary, FDA                   | Amahdi Shabaka, BCG                            |
| Margaret Ochocinska, NIH               | Dhara Shah, CSTE                               |
| Samantha Olson, CDC                    | Stuart Shapiro, NIH                            |
| Jason Opdyke, DoD                      | Norman Sharpless, NIH                          |
| Michele Owen, CDC                      | Mallory Shriver, University of Maryland        |
| Mark Page, NIBSC                       | Amy Shurtleff, CEPI                            |

|                                            |                                      |
|--------------------------------------------|--------------------------------------|
| Rolando Pajon, Moderna                     | Brian Shy, UCSF                      |
| C. Palaniappan, Ortho Clinical Diagnostics | Karen Lohmann Siegel, VA             |
| Louise Sigismondi, ChemBio                 | Sujata Vijh, NIH                     |
| Twee Sim, DoD                              | Jon Warren, NIH                      |
| Stephanie Sincock, HHS                     | James Wassenberg, DiaSorin           |
| Dinah Singer, NIH                          | Paige Waterman, WRAIR                |
| Anjali Singh, NIH                          | Kristin Weidemaier, Becton Dickinson |
| Jordan Smith, HHS                          | Doug Whitman, Luminex Corp           |
| Sandra Smole, State Public Health          | Jeffrey Whitman, UCSF                |
| Tim Solberg, FDA                           | Kathryn Wildt, DoD                   |
| Dornette Spell-LeSane, FDA                 | Jeremiah Wille, HHS                  |
| Kimberly Stemple, NIH                      | Carolyn Williams, NIH                |
| Timothy Stenzel, FDA                       | Mark Williams, NIH                   |
| David Stephens, Emory Univ                 | Matt Wilson, OSTP                    |
| Guillaume Stewart-Jones, Moderna           | Mark Wobken, Nano                    |
| Jessica Stone, BCG                         | Meghan Wolfgang, Becton Dickinson    |
| Mars Stone, Vitalant                       | Sara Woodson, NIH                    |
| Helena Sun, Nano                           | Kate Woodworth, CDC                  |
| Jacqueline Tate, CDC                       | Jens Wrammert, Emory University      |
| Rachel Tell, USDA                          | Alan Wright, Roche                   |
| Mark Thompson, CDC                         | Kelly Wroblewski, APHL               |
| Natalie Thornburg, CDC                     | Catherine Yen, NIH                   |
| Tristan Timbrook, BioFire Diagnostics      | Ruby Yu, UCSF                        |
| Frances Tong, Becton Dickinson             | F. Zachar, FEMA                      |
| Tina Tong, NIH                             | Vladislav Zaitsev, Abbott            |
| Randall Tressler, NIH                      | Lowell Zeta, FDA                     |
| Annabel Tsai, inbios                       | Huadi Zhang, BCG                     |
| Danielle Turley, HHS                       | Sheryl Zwierski, NIH                 |
| Susan Van Meter, AdvaMed                   |                                      |
| Koen Van Rompay, UC Davis                  |                                      |
| Vic Veguilla, CDC                          |                                      |
| Savin Ven Johnson, FEMA                    |                                      |

**Supplemental Table 1: COVID-19 Serology Studies Workshop Organizing Committee**

|                                     |                         |
|-------------------------------------|-------------------------|
| M. Cristina Casseti, NIH (Co-Chair) | Francisco Averhoff, CDC |
| Matthew Hepburn, DoD (Co-Chair)     | Sue Gerber, CDC         |
| Tammy Beckham, DHHS/OASH            | Dan Jernigan, CDC       |
| Rosemary Humes, BARDA               | Michele Owen, CDC       |
| Michael Merchlinsky, BARDA          | Lyle R. Petersen, CDC   |
| Maureen Beanan, NIH                 | Natalie Thornburg, CDC  |
| Robert W. Eisinger, NIH             | Steve Gitterman, FDA    |
| Andrea Lerner, NIH                  | Jeet Guram, FDA         |
| Douglas R. Lowy, NIH                | Brendan O'Leary, FDA    |
| Hilary Marston, NIH                 | Ian Simon, OSTP         |
| Christina McCormick, NIH            | Paige Waterman, OSTP    |

|                        |                     |
|------------------------|---------------------|
| Diane Post, NIH        | M. Louise Pitt, DoD |
| Connie Schmaljohn, NIH | Victoria Davey, VA  |

**Key:**

Biomedical Advanced Research and Development Authority (BARDA)

Centers for Disease Control and Prevention (CDC)

Department of Defense (DoD)

Department of Health and Human Services (DHHS)

Department of Veterans Affairs (VA)

National Institutes of Health (NIH)

Office of the Assistant Secretary for Health (OASH)

Office of Science and Technology Policy (OSTP)
